# Supplementary material for: Factors Influencing the Prognosis of Patients with Myalgic Encephalomyelitis/Chronic Fatigue Syndrome
Source: Diagnostics (Basel). 2022 Oct 19;12(10):2540. doi: 10.3390/diagnostics12102540 (PMC9600584; doi:10.3390/diagnostics12102540)
Supplement: Supplementary file 1 [file diagnostics-12-02540-s001.zip › diagnostics-1952041-supplementary.pdf]

**Table S1.** Epidemiological characteristics, clinical manifestations, and comorbidities of recovered patients and significantly improved patients.

|                                               | Recovered patients <i>n</i> = 14 | Significantly improved patients <i>n</i> = 8 | <i>p</i> |
|-----------------------------------------------|----------------------------------|----------------------------------------------|----------|
| <b>Epidemiological characteristics</b>        |                                  |                                              |          |
| Female, <i>n</i> (%)                          | 9 (64.3)                         | 7 (87.5)                                     | 0.239    |
| BMI, Kg/m <sup>2</sup>                        | 27 (22–27)                       | 22.4 (20.1–26.2)                             | 0.632    |
| Age at data collection, years                 | 42.3 (38.4–56)                   | 48.3 (47.8–55.8)                             | 0.339    |
| Age at disease onset, years                   | 36.5 (31.3–47.5)                 | 43 (36.3–47.8)                               | 0.47     |
| Age at diagnosis, years                       | 37.5 (33–49.5)                   | 44.5 (41.8–52.3)                             | 0.289    |
| Diagnostic delay, months                      | 16 (16.3–40)                     | 26 (13–31.5)                                 | 0.632    |
| Age at R/I <sup>a</sup> , years               | 40.8 (34.7–51.8)                 | 47.0 (44.8–54.1)                             | 0.274    |
| Time from onset to R/I, months                | 48 (28–63)                       | 47.5 (35.5–58.5)                             | 0.864    |
| Time from diagnosis to R/I, months            | 32 (7.3–23)                      | 21 (8.3–34.3)                                | 0.516    |
| Time of follow up, months                     | 49.5 (40.5–55)                   | 29.5 (32.3–56.3)                             | 0.584    |
| Time of follow up post R/I, months            | 17.5 (15–40)                     | 8.5 (11.3–25.5)                              | 0.180    |
| Sudden onset of the illness, <i>n</i> (%)     | 7 (50)                           | 7 (87.5)                                     | 0.167    |
| Identified illness precipitants, <i>n</i> (%) | 117 (78.6)                       | 7 (87.5)                                     | 0.538    |
| <b>Clinical manifestations, <i>n</i> (%)</b>  |                                  |                                              |          |
| Post exertional malaise severity              | 9.8 (8–12]                       | 10 (8–13)                                    | 0.426    |
| Difficulty processing information             | 14 (100)                         | 8 (100)                                      | NC       |
| Short-term memory loss                        | 14 (100)                         | 7 (87.5)                                     | 0.363    |
| Headaches                                     | 10 (71.4)                        | 6 (75)                                       | 0.84     |
| Myalgia                                       | 12 (54.5)                        | 8 (100)                                      | 0.515    |
| Arthralgia                                    | 8 (36.4)                         | 5 ()                                         | 1.00     |
| Disturbed sleep patterns                      | 12 (85.7)                        | 7 (87.5)                                     | 1.00     |
| Unrefreshed sleep                             | 14 (63.6)                        | 6 (75)                                       | 0.121    |
| Neurosensory and perceptual disturbances      | 11 (78.6)                        | 7 (87.5)                                     | 1.00     |
| Motor disturbances                            | 13 (92.9)                        | 8 (100)                                      | 1.00     |
| Flu-like symptoms                             | 6 (42.9)                         | 4 (50)                                       | 0.759    |
| Recurrent infections                          | 4 (28.6)                         | 4 (50)                                       | 0.418    |
| Gastrointestinal impairments                  | 13 (59.1)                        | 7 (87.5)                                     |          |
| Urinary impairments                           | 3 (21.4)                         | 1 (12.5)                                     | 1.00     |
| Orthostatic intolerance                       | 3 (21.4)                         | 3 (37.5)                                     | 0.624    |
| Palpitation                                   | 10 (71.4)                        | 4 (50)                                       | 0.386    |
| Vertigo                                       | 10 (71.4)                        | 6 (75)                                       | 0.840    |
| Respiratory involvement                       | 6 (42.9)                         | 4 (50)                                       | 0.759    |
| Intolerance to extreme temperatures           | 8 (57.1)                         | 5 (62.5)                                     | 1.00     |
| <b>Comorbidities, <i>n</i> (%)</b>            |                                  |                                              |          |
| Reactional depression                         | 5 (35.7)                         | 3 (37.5)                                     | 1.00     |
| Thyroiditis                                   | 2 (14.3)                         | 1 (12.5)                                     | 1.00     |
| Fibromyalgia                                  | 1 (7.1)                          | 0 (0.0)                                      | 1.00     |
| Irritable bowel syndrome                      | 4 (28.6)                         | 1 (12.5)                                     | 0.60     |

Qualitative data were expressed as absolute number and percentage; Quantitative data were expressed as median and quartiles; <sup>a</sup>Recovery/significant improvement.
